# Supplementary material for: Formation and interconversion of CCN and CNC radicals resulting from the radiation-induced decomposition of acetonitrile in solid noble gas matrices
Source: Royal Society of Chemistry journal article supplement (doi:10.1039/c8cp07896c), 2019-01-01
Supplement: c8cp07896c1.pdf [file c8cp07896c1.pdf]

### Electronic Supporting Information

Anastasia D. Volosatova, Svetlana V. Kameneva, Vladimir I. Feldman\*

Department of Chemistry, Lomonosov Moscow State University, 119991 Moscow, Russia

\* corresponding author, e-mail: feldman@rad.chem.msu.ru

**Table S1.** The IR absorption maxima for isolated CD<sub>3</sub>CN in solid noble gas matrices, cm<sup>-1</sup>.

| CD <sub>3</sub> CN                    |        |                  |        |        |
|---------------------------------------|--------|------------------|--------|--------|
| Type of mode                          | Ne     | Ar               | Kr     | Xe     |
| ν <sub>1</sub> (CH str.)              | 2128.6 | 2122.1 (2122.1*) | 2116.2 | 2115.7 |
|                                       | 2123.6 | 2118.2 (2118.3*) | 2114.2 | 2111.8 |
| ν <sub>2</sub> (CN str.)              | 2275.6 |                  | 2264.7 | 2270   |
|                                       | 2273.6 | 2267.1 (2267.3*) | 2259.5 | 2267.2 |
| ν <sub>3</sub> (CH <sub>3</sub> def.) | 1109.6 | 1104.4 (1104.7*) | 1102.9 | 1104.1 |
|                                       | 1107.5 | (1103.3*)        | 1098.4 | 1101.2 |
| ν <sub>4</sub> (CC str.)              | 836    | 831.1 (831.1*)   | 832.9  | 835.7  |
|                                       | 833    | 829.0 (829.7*)   | 830.8  | 831.5  |
|                                       |        | (829.1*)         | 827.7  | 829.5  |
| ν <sub>5</sub> (CH str.)              |        | 2253.7 (2253.7*) | 2247   | 2249.8 |
| ν <sub>6</sub> (CH <sub>3</sub> def.) | 1050.1 | 1045.5 (1046.8*) | 1043.6 | 1042.1 |
|                                       | 1048   | 1042.7 (1043.1*) | 1040.5 | 1038   |
|                                       | 1046.1 | 1040.1 (1040.1*) | 1037.9 | 1034.5 |
|                                       | 1041.6 | 1036.9 (1036.9*) | 1032.6 | 1029.4 |
| ν <sub>7</sub> (CH <sub>3</sub> rock) | 851.7  | (852.5*)         | 848.3  | 848    |
|                                       | 848    | 849.3 (849.5*)   | 844.5  | 845    |
|                                       |        | 845.6 (845.5*)   | 838.3  | 841.8  |
| ν <sub>7</sub> + ν <sub>8</sub>       | 1195   | 1187.9 (1189.7*) | 1188.5 | 1185.7 |
|                                       | 1192.6 | 1183.3 (1183.7*) | 1181.4 | 1182.5 |
|                                       | 1184.7 | (1182.9*)        | 1174.3 | 1180.8 |

\*Taken from: T. B. Freedman and E. R. Nixon, *Spectrochim. Acta Part A Mol. Spectrosc.*, 1972, **28** by (Freedman and Nixon 1972)
